# Supplementary material for: Network Topological Analysis for the Identification of Novel Hubs in Plant Nutrition
Source: Front Plant Sci. 2021 Feb 10;12:629013. doi: 10.3389/fpls.2021.629013 (PMC7928335; doi:10.3389/fpls.2021.629013)
Supplement: Supplementary Table 3 — Co-expression and physical interaction under Fe sufficiency (+Fe+Mo and +Fe−Mo samples), Mo sufficiency (+Fe+Mo and −Fe+Mo), Fe starvation (−Fe+Mo, −Fe−Mo), and Mo starvation (+Fe−Mo, −Fe−Mo). [file Data_Sheet_2.xlsx]

## Sheet: Table S3
	Table S3 Co-expression and physical interaction under Fe sufficiency (+Fe +Mo and +Fe -Mo samples), Mo sufficiency (+Fe +Mo and -Fe+Mo) , Fe starvation (-Fe+Mo, -Fe-Mo), Mo starvation (+Fe-Mo, -Fe-Mo). A) Proteins which were retrieved as co-expressed (Spearman’s rank correlation score>|0.7| and P<0.01) and physically interacting (according to STRING db, Database Score>0.35 and Experiment/Biochemi…										Interactions
		Spearman's correlation Score				Stringdb PPI				Condition	Co-expression	PPI	Ratio PPI/Co-expression (%)
A)	Interaction	+Fe	+Mo	-Fe	-Mo	Databases	Experiments		B)	Fe	2193	135	6.15595
	VHA-A (pp) ATP5				0.765011	0.36				Mo	1634	119	7.28274
	VDAC2 (pp) VDAC1		-0.87652			0.54				-Fe	1911	98	5.12821
	VDAC4 (pp) VDAC1				0.721766	0.54				-Mo	1547	91	5.88235
	ALDH12A1 (pp) mtLPD1	0.736771	0.764388			0.6
	ASP1 (pp) SDH2-2	-0.713542				0.6
	AT2G35120 (pp) ALDH12A1	0.817029				0.6
	CAC1 (pp) ATCS	0.818374				0.6
	CAC1 (pp) CSY3			0.800536		0.6
	CSY3 (pp) NAD-ME1	0.811516			0.702482	0.6
	CSY3 (pp) NAD-ME2		0.762116			0.6
	GDH1 (pp) mMDH1	-0.823119				0.6
	GDH2 (pp) IDH-V			-0.779964		0.6
	GDH2 (pp) IDH1	0.755245		0.766756	0.840659	0.6
	GDH2 (pp) mMDH1	-0.914187				0.6
	GDH2 (pp) mtLPD1	0.727273	0.747797			0.6
	GLN1-1 (pp) GDH2	0.705696	0.717695			0.6
	GOX1 (pp) PYD4				0.766432	0.6
	IDH-V (pp) ALAAT2			0.783349		0.6
	MDH (pp) GDH2			0.767905		0.6
	NAD-ME1 (pp) ATCS		0.736264	0.775		0.6
	PYD4 (pp) At1g55510			0.779497		0.6
	PYD4 (pp) GOX1			0.827911		0.6
	SDH1-1 (pp) ALAAT2			-0.755596		0.6
	TRA2 (pp) HXK1		-0.834804	-0.814353		0.6
	ACX1 (pp) PKT3				0.807577	0.65
	AGT2 (pp) GLDP2		0.789011	0.860465		0.65
	AGT2 (pp) SHM1	0.725045			0.824176	0.65
	PYD4 (pp) GLDP2		0.780122	0.871877		0.65
	ATP1 (pp) AT2G07698	0.734266				0.8
	BCE2 (pp) ALDH2B7				0.78022	0.8
	NAD-ME2 (pp) NAD-ME1		0.775824			0.8
	PKT3 (pp) AT5G08300	0.807023			0.721766	0.8
	PYD4 (pp) AGT2	0.767076	0.751393	0.740102		0.8
	PYD4 (pp) BCE2	0.769231				0.8
	At1g07940 (pp) CAT			-0.792451		0.9
	At1g07940 (pp) HXK1			-0.761764		0.9
	AT1G14450 (pp) AT2G02050		0.714322			0.9
	AT1G14450 (pp) AT3G03100				0.705566	0.9
	AT1G14450 (pp) AT4G02580	0.82656				0.9
	AT1G14450 (pp) AT5G11770				-0.745178	0.9
	AT1G14450 (pp) CIB22	0.709745				0.9
	AT1G14450 (pp) OEP16-3	0.761073				0.9
	AT1G16700 (pp) OEP16-3	0.822126				0.9
	AT2G33220 (pp) AT2G27730	0.77193				0.9
	AT3G08610 (pp) At5g67590			0.76889		0.9
	AT5G08300 (pp) AT4G26910				0.708791	0.9
	AT5G47890 (pp) AT2G27730	-0.801717	-0.764589			0.9
	AT5G47890 (pp) AT3G08610	0.760508				0.9
	CAC1 (pp) ALDH6B2			0.808573		0.9
	cICDH (pp) FAC1			0.741181		0.9
	cICDH (pp) HXK1	0.753225				0.9
	cICDH (pp) LOS1	0.848673				0.9
	GDH2 (pp) GDH1	0.727273				0.9
	GLDH (pp) TAPX	0.759504			0.776645	0.9
	HXK1 (pp) CAT		0.70705		0.709767	0.9
	LTA3 (pp) AT1G54220				-0.858323	0.9
	MFP2 (pp) AIM1	0.751324	0.833545			0.9
	MGP1 (pp) ATPQ	0.812611	0.719472	0.714924	0.790637	0.9
	mtLPD1 (pp) CI51	0.783217	0.836084			0.9
	NAD-ME1 (pp) FUM1			0.784629	0.857143	0.9
	OEP16-3 (pp) AT2G20360	0.708261				0.9
	OEP16-3 (pp) AT3G03100		0.740751			0.9
	OEP16-3 (pp) AT4G02580		0.765095			0.9
	OEP16-3 (pp) AT5G11770				-0.706396	0.9
	OEP16-3 (pp) CIB22	0.767606				0.9
	OEP16-3 (pp) EMB1467		0.700824			0.9
	PHB2 (pp) AT2G33220			0.735243		0.9
	PHB3 (pp) AT2G33220	0.781087			0.795049	0.9
	SDH5 (pp) SDH2-2				0.720771	0.9
	CSY3 (pp) PKT3	0.809011				0.6	0.045
	PKT3 (pp) CSY3		0.717612			0.6	0.045
	FUM1 (pp) AT4G26910	0.72028	0.723873			0.36	0.048
	VHA-A (pp) AT5G08680				-0.70381	0.36	0.048
	OEP16-3 (pp) VDAC1	-0.733338				0.54	0.049
	FAC1 (pp) AT4G23900				0.893839	0.9	0.051
	CSY3 (pp) GDH2				0.763088	0.6	0.052
	GDH1 (pp) ATCS				0.967033	0.6	0.052
	GDH2 (pp) ATCS		0.79208			0.6	0.052
	ALDH12A1 (pp) GLDP2	0.857787				0.6	0.078
	AT2G45290 (pp) PDE345		0.759382			0.65	0.081
	IDH-V (pp) ALDH5F1				0.779614	0.8	0.095
	AT5G47890 (pp) PHB3	-0.777876				0.9	0.096
	UGP1 (pp) SDH2-2	-0.791595					0.1
	LOS1 (pp) VHA-A				0.737607		0.101
	VHA-A (pp) IDH-V			-0.728929	-0.735422		0.101
	VHA-A (pp) LOS1	0.786418	0.75614				0.101
	AT2G35120 (pp) GLDP2	0.754568				0.9	0.101
	ALDH12A1 (pp) ALDH6B2		0.771876	0.764286			0.102
	GAPC1 (pp) ALDH12A1			0.802402			0.102
	ftsh4 (pp) AT2G20360	0.785965	0.820683				0.103
	AT1G24360 (pp) ALDH5F1				-0.803685		0.104
	CPN60B (pp) MPPBETA				0.797787		0.104
	HSP60 (pp) AT1G51980			-0.737032			0.104
	HSP60-3A (pp) AT1G51980		0.723077	0.741734			0.104
	AT2G42710 (pp) MTHSC70-2			0.712845			0.106
	BIP2 (pp) AT2G42710				0.72449		0.106
	GDH2 (pp) AT5G08680	-0.832168					0.106
	BIP2 (pp) LOS1	0.934282			0.756171		0.109
	LOS1 (pp) MTHSC70-2				0.70882		0.109
	MST1 (pp) HSP60-3A			0.745081			0.109
	At5g67590 (pp) VDAC1			0.70583	0.704265		0.112
	VDAC1 (pp) AT2G20360	-0.742558					0.112
	ATP3 (pp) AT1G51980	-0.707532					0.113
	LOS1 (pp) AT5G11770	-0.711285					0.113
	PHT3;1 (pp) AT1G54220	0.748252					0.114
	VDAC1 (pp) AT5G08680	0.888112	0.876923	0.921429	0.879121		0.115
	VDAC2 (pp) AT5G08680		-0.761374				0.115
	CSY3 (pp) FUM1				0.721766	0.6	0.115
	FUM1 (pp) ATCS		0.730473	0.739947		0.6	0.115
	At1g55510 (pp) HSP60-3A		0.871889	0.762601			0.116
	VDAC2 (pp) HXK1	-0.750877					0.116
	AT1G16700 (pp) VDAC1	-0.903224	-0.857829	-0.835457	-0.921272		0.117
	AT1G16700 (pp) VDAC4			0.736916			0.117
	AT3G58140 (pp) HSP60-3A	0.824196					0.117
	GDH2 (pp) HXK1			-0.708408			0.117
	VDAC2 (pp) AT1G16700		0.902527				0.117
	ACX1 (pp) AIM1		0.779269			0.65	0.117
	AIM1 (pp) CAT	0.78171					0.118
	AT1G16700 (pp) MTHSC70-2	0.776325	0.841817	0.888242			0.119
	VDAC4 (pp) PHT3;1	-0.700526					0.119
	AT1G24360 (pp) IDH-V				-0.885751		0.12
	RFNR1 (pp) CI51			0.78169			0.12
	ACX1 (pp) IDH1				0.738484		0.121
	AT4G31810 (pp) MFP2	0.86553			0.827357		0.121
	BCE2 (pp) AT2G20420	-0.895105					0.121
	ETFALPHA (pp) AT1G51980		0.786752				0.121
	VHA-A (pp) AT2G20420				-0.72985		0.121
	LTA3 (pp) AT2G20420		-0.718681			0.6	0.121
	AT1G70190 (pp) AT2G20420				-0.769439		0.122
	LOS1 (pp) ACT7	0.8135		0.775956	0.83952		0.122
	TIM13 (pp) AAC2				0.849665		0.122
	VDAC1 (pp) MTHSC70-2	-0.727273	-0.832967	-0.789286			0.122
	VDAC2 (pp) MTHSC70-2		0.761374				0.122
	VDAC4 (pp) MTHSC70-2		0.706271				0.122
	At1g07940 (pp) MAB1			-0.72862			0.123
	ALDH12A1 (pp) GDH2		0.872796			0.9	0.123
	Hsp89.1 (pp) VDAC1	-0.796496	-0.731868	-0.797141			0.124
	Hsp89.1 (pp) VDAC4	0.768015					0.124
	PHB3 (pp) AT5G40810		0.759076	0.781055			0.124
	VDAC2 (pp) Hsp89.1		0.704975				0.124
	mtLPD1 (pp) FUM1		0.898678				0.125
	TUA4 (pp) BIP2				0.721492		0.125
	AT4G15940 (pp) FUM1			0.748489		0.8	0.125
	LOS1 (pp) HSP60-3A	0.797189			0.73606		0.126
	MIRO1 (pp) AT2G07698	-0.714537					0.126
	SDH1-1 (pp) mMDH1		-0.74009				0.126
	OWL1 (pp) AT1G51980			0.83198			0.127
	NFU4 (pp) MTHSC70-2	0.717863	0.972391	0.754921			0.128
	PKT3 (pp) CAT	0.940357					0.128
	mMDH1 (pp) EMB1467		-0.789011		-0.747253		0.129
	AT1G72160 (pp) POP2				-0.899588		0.13
	AT5G20080 (pp) AT1G51980		0.855886	0.812166			0.13
	GRX4 (pp) MTHSC70-2		0.85302	0.750606			0.13
	SDH1-1 (pp) CPN60B	-0.718806					0.131
	GDH1 (pp) ALDH2B7		0.762637		0.78022	0.6	0.131
	AT5G05520 (pp) VDAC1	-0.713287	-0.918162	-0.909801	-0.715269		0.132
	PHB3 (pp) ATPQ				0.796703		0.132
	VDAC2 (pp) AT5G05520		0.794831				0.132
	cICDH (pp) MSD1		0.729754				0.134
	GLDH (pp) IDH1	0.802293	0.815606				0.134
	VDAC1 (pp) AAC2			-0.735902			0.134
	VDAC2 (pp) AAC2		-0.778878	-0.749109			0.134
	cICDH (pp) CAT	0.828188				0.9	0.134
	EMB1467 (pp) AT5G08680			-0.732143			0.139
	IDH1 (pp) AT5G08300	0.769231		0.785714	0.769231		0.139
	mtLPD1 (pp) AT2G20360	0.756569				0.9	0.139
	FUM1 (pp) CI51		0.814082				0.141
	LOS1 (pp) CI51	0.718328					0.141
	GAPC1 (pp) Hsp89.1			0.733566			0.145
	BCE2 (pp) AT4G26910	0.783217	0.745055				0.147
	SDH1-1 (pp) AT2G20420	-0.704029				0.65	0.148
	GRP7 (pp) LTA3			0.750947			0.151
	TRA2 (pp) AT1G64190				0.820445		0.151
	AT5G25450 (pp) AT2G20360	-0.774082					0.153
	ALDH12A1 (pp) AGT2			0.725648			0.154
	PYD4 (pp) ALDH12A1			0.813385			0.154
	POP2 (pp) ALDH2B7		0.789011	0.710714	0.873626	0.8	0.154
	POP2 (pp) ALDH5F1				0.822559	0.9	0.154
	ALDH12A1 (pp) FUM1		0.730096	0.713137			0.155
	ATP1 (pp) AT1G51980	-0.872155	-0.736264	-0.796429	-0.763736		0.155
	GDH2 (pp) TAPX	0.902098					0.155
	TIM9 (pp) CI51	-0.84211			-0.745883		0.155
	VDAC1 (pp) AT2G07698		0.740659				0.155
	VDAC1 (pp) ATP1		0.727473				0.155
	VDAC2 (pp) AT2G07698		-0.824821				0.155
	VDAC4 (pp) ATP1				-0.749314		0.155
	AT5G25260 (pp) AT4G22310	0.820836					0.156
	AT5G27470 (pp) HSP60-3A			0.80281			0.156
	CYSC1 (pp) ALDH2B7		0.712872		0.835165		0.156
	MTHSC70-2 (pp) AT2G07698	-0.713287	-0.868132				0.156
	MTHSC70-2 (pp) ATP1		-0.78022				0.156
	AT4G26910 (pp) AT2G20420	-0.713287				0.9	0.156
	CSY3 (pp) IDH1	0.847109					0.157
	OWL1 (pp) Hsp89.1			0.881708			0.157
	mtLPD1 (pp) CBSX3	-0.783217					0.161
	AT2G45290 (pp) AT1G64190		0.738699				0.164
	AT4G22310 (pp) OEP16-3	0.802125					0.165
	GRP7 (pp) LOS1	0.795745			0.938842		0.168
	mMDH1 (pp) FUM1	-0.78459				0.65	0.168
	AT5G27470 (pp) GRP7				0.804283		0.169
	OWL1 (pp) MTHSC70-2			0.816922			0.171
	GDH2 (pp) PHT3;1		0.700441	0.72093			0.172
	ATP1 (pp) AT3G55410	-0.706294					0.173
	At5g67590 (pp) AT2G07698	-0.713287					0.175
	AT4G11630 (pp) AIM1	0.717913	0.871262				0.176
	AT4G11630 (pp) MFP2		0.879386				0.176
	mMDH1 (pp) HSP60-3A				-0.765843		0.178
	MPPBETA (pp) AT4G27585				0.810519		0.178
	AT1G51980 (pp) AAC2			-0.778571			0.181
	AT4G15940 (pp) PYD4			0.818135			0.185
	LOS1 (pp) At1g07940			0.701275		0.9	0.186
	LPD1 (pp) AT2G33220	-0.800119					0.189
	AIM1 (pp) MSD1	0.747806	0.875688				0.192
	AT2G26230 (pp) CAT	0.780057					0.192
	MFP2 (pp) MSD1		0.882136				0.192
	AT5G10160 (pp) AT1G24360	0.701635				0.65	0.198
	At1g07940 (pp) ACT7			0.769581			0.212
	SDH1-1 (pp) AT5G08300	0.721542				0.65	0.22
	GAPC1 (pp) AT2G45290			0.755753		0.9	0.221
	NFS1 (pp) NFU4		0.74067				0.235
	IDH-V (pp) AT4G26910				-0.737277		0.24
	IDH-V (pp) AT5G08300	-0.826621	-0.850549	-0.770331			0.24
	BIP2 (pp) HSP60-3A	0.745602					0.242
	AT3G56460 (pp) ALDH12A1		0.756135	0.711353			0.246
	BCE2 (pp) ATCS				0.824176		0.246
	MTACP-1 (pp) mMDH1		-0.737874				0.254
	AT2G45290 (pp) TRA2			0.735508		0.9	0.26
	AT4G11630 (pp) MSD1	0.788902	0.774112				0.266
	HSP60-3A (pp) MTHSC70-2		0.815385				0.267
	MTHSC70-2 (pp) CPN60B	-0.807023					0.267
	MTHSC70-2 (pp) HSP60		-0.903297				0.267
	AT2G42710 (pp) AT1G23410	0.867515					0.269
	mMDH1 (pp) CSY3			-0.808588		0.65	0.271
	CSY3 (pp) IDH-V	-0.868204					0.276
	GF14 (pp) ACT7				0.762453		0.28
	Hsp89.1 (pp) MTHSC70-2	0.729829	0.951648	0.82395	0.748281		0.299
	mMDH1 (pp) IDH-V		0.81978		0.778543		0.299
	GRX4 (pp) PANB2			0.879866			0.301
	PKT3 (pp) VDAC1	-0.838602					0.31
	Hsp89.1 (pp) HSP60		-0.863736				0.311
	Hsp89.1 (pp) HSP60-3A	0.750441	0.736264	0.760286			0.311
	MFP2 (pp) AT3G49080				0.756423		0.311
	ACP1 (pp) AT1G51980				0.848679		0.313
	VDAC4 (pp) ATP3	-0.847637					0.329
	ALDH12A1 (pp) VDAC1		-0.744763	-0.85			0.335
	VDAC2 (pp) ALDH5F1		-0.719163		-0.742779		0.335
	AIM1 (pp) PKT3	0.858663	0.721246			0.9	0.346
	MFP2 (pp) PKT3		0.773882			0.9	0.346
	VDAC2 (pp) ATPQ	-0.742558					0.372
	AT1G70190 (pp) LOS1	0.720641			0.790977		0.386
	AT2G18330 (pp) AT5G40810				-0.714841		0.463
	LTA3 (pp) ATCS		0.701099			0.65	0.465
	VDAC1 (pp) ATP5	-0.79021	-0.767033	-0.707143			0.467
	VDAC2 (pp) ATP5		0.789573				0.467
	VDAC4 (pp) ATP5		0.734874	0.836461	0.727275		0.467
	AT2G02050 (pp) AT1G51980			0.729888			0.468
	LON1 (pp) CLPX		0.731262				0.469
	Hsp89.1 (pp) AT5G08680	-0.828075		-0.7042			0.473
	TOM20-2 (pp) TOM40		-0.774478				0.474
	MAB1 (pp) AT4G26910			-0.896429	-0.807166		0.476
	SDH2-2 (pp) ATCS				-0.751032		0.476
	At1g55510 (pp) BCE2				0.717801	0.9	0.476
	SDH1-1 (pp) AT5G25450		-0.715861				0.477
	AT2G42710 (pp) LOS1	0.802914					0.479
	AT2G02050 (pp) VDAC1		-0.814177	-0.829997			0.487
	GOX1 (pp) GRP7		0.741283		0.845098		0.523
	COX6B (pp) AT1G51980	-0.782456					0.529
	AT1G16700 (pp) AT1G51980			0.788133			0.535
	GAPC1 (pp) GRP7		0.743744	0.740891			0.537
	GRP7 (pp) ACT7	0.757661			0.732153		0.539
	LTA3 (pp) AT4G26910		0.753846				0.543
	AT1G16700 (pp) AT5G05520	0.88083	0.766825	0.816955	0.848963		0.545
	Hsp89.1 (pp) AT2G07698	-0.771935	-0.81978	-0.786417			0.545
	Hsp89.1 (pp) ATP1	-0.708776	-0.793407		-0.701514		0.545
	GRP7 (pp) At1g07940			0.74567			0.563
	COX6B (pp) AT5G25450	0.735553					0.565
	TOM40 (pp) AT5G47030			0.7359			0.566
	CI51 (pp) AT1G51980		0.740659	0.795353			0.576
	CIB22 (pp) AT1G51980	0.778952					0.576
	CPN60B (pp) AT1G23100			-0.739443			0.598
	EMB1467 (pp) AT1G51980				0.813187		0.601
	VDAC1 (pp) HXK1				-0.736264		0.681
	cICDH (pp) IDH1	0.92263	0.87437			0.65	0.694
	AT3G03100 (pp) AT5G08680		-0.749778				0.696
	mtLPD1 (pp) MAB1	-0.902098	-0.717272			0.9	0.706
	AT5G47890 (pp) TOM40	-0.89163					0.724
	cICDH (pp) IDH-V	-0.745948				0.65	0.731
	LTA3 (pp) mtLPD1		0.926293			0.9	0.731
	AT3G03100 (pp) AT1G51980		0.709731	0.828862			0.732
	AT5G40810 (pp) AT1G51980				-0.769231	0.9	0.745
	AT5G47890 (pp) AT5G40810		-0.722863				0.749
	ACP1 (pp) AT2G33220		-0.747954				0.752
	LTA3 (pp) MAB1		-0.749451			0.9	0.754
	AT4G11630 (pp) AT3G18240			0.842277			0.785
	MCCA (pp) MCCB	0.847431				0.9	0.79
	BCE2 (pp) mtLPD1		0.763477			0.9	0.803
	ATP3 (pp) AT2G07698	0.713287					0.812
	ACP1 (pp) AT4G02580			0.719646			0.813
	ACP1 (pp) EMB1467				0.9168		0.813
	AT3G18410 (pp) AT3G52730				0.713501		0.818
	ATP5 (pp) AT5G08680	-0.762238				0.9	0.826
	AT1G23410 (pp) LOS1	0.75769					0.83
	AT1G16700 (pp) AT2G02050		0.789853	0.833024		0.9	0.83
	ATP5 (pp) AT2G07698		-0.846154				0.832
	ATP5 (pp) ATP1			-0.717857		0.54	0.832
	ATP5 (pp) ATP3	-0.797203				0.9	0.832
	AT1G16700 (pp) AT2G20360	0.714125				0.9	0.837
	AT5G52840 (pp) AT2G20360		-0.718681			0.9	0.837
	AT1G16700 (pp) AT3G03100				0.708446	0.9	0.839
	AT1G16700 (pp) AT3G12260		0.713355			0.9	0.84
	MPPBETA (pp) AT5G13430				0.781166	0.9	0.84
	AT4G02580 (pp) AT3G52730		-0.708284				0.841
	EMB1467 (pp) AT5G11770	-0.839161				0.9	0.857
	AT3G03100 (pp) AT5G11770	-0.775443				0.9	0.858
	AT5G47890 (pp) AT2G33220	-0.801717				0.9	0.858
	MPPBETA (pp) AT4G37830				0.755556	0.36	0.87
	AT4G02580 (pp) AT2G20360	0.755713				0.9	0.903
	CI51 (pp) AT2G20360	0.753066			0.757576	0.9	0.913
	AT3G03100 (pp) EMB1467	0.719303		0.776608	0.721766	0.9	0.922
	IDH1 (pp) IDH-V	-0.767076				0.9	0.925
	AT3G03100 (pp) AT2G20360				0.725518	0.9	0.964
	AT2G02050 (pp) AT3G12260		0.800677			0.9	0.965
	AT4G02580 (pp) CI51	0.701759				0.9	0.965
	EMB1467 (pp) CI51	0.762238				0.9	0.965
